# Supplementary material for: Metabolic Adjustment of High Intertidal Alga Pelvetia canaliculata to the Tidal Cycle Includes Oscillations of Soluble Carbohydrates, Phlorotannins, and Citric Acid Content
Source: MDPI journal article supplement (doi:10.3390/ijms241310626), 2023-06-25
Supplement: s1 [file s1]

**Metabolic adjustment of high intertidal alga *Pelvetia canaliculata* to the tidal cycle includes oscillations of soluble carbohydrates, phlorotannins, and citric acid content.**

Renata Islamova <sup>1</sup>, Nikolay Yanshin <sup>1</sup>, Elizaveta Zamyatkina <sup>1</sup>, Ekaterina Gulk <sup>1</sup>, Ekaterina Zuy <sup>1</sup>, Susan Billig <sup>2</sup>, Claudia Birkemeyer <sup>2,3</sup> and Elena Tarakhovskaya <sup>1,4,\*</sup>

<sup>1</sup> Department of Plant Physiology and Biochemistry, Faculty of Biology, Saint Petersburg State University, Universitetskaya nab., 7/9, Saint Petersburg 199034, Russia.

<sup>2</sup> Faculty of Chemistry and Mineralogy, Leipzig University, Linnestr. 3, 04103 Leipzig, Germany.

<sup>3</sup> German Center for Integrative Biodiversity Research (iDiv) Halle-Leipzig-Jena, 04103 Leipzig, Germany.

<sup>4</sup> Vavilov Institute of General Genetics, Saint Petersburg Branch, Russian Academy of Science, Universitetskaya nab., 7/9, Saint Petersburg 199034, Russia.

\* Correspondence: e.tarakhovskaya@spbu.ru, elena.tarakhovskaya@gmail.com

**Table S1. Retention times (RT), calculated retention indexes (RI) and content of compounds detected in *Pelvetia canaliculata*.** Presented are identified metabolites and chemically classified unknowns. All values of metabolite content represent the means of 5 replicates  $\pm$  standard deviation (absence of the value means that only relative quantification was made this compound). **HW** – high water, **ET** – ebb tide, **LW** – low water; **RT** – rising tide. Abundant metabolites are marked with bold font.

| No. | Analyte           | RT<br>(min) | RI   | Quantification,<br><i>m/z</i> $\pm$ 0.5 | Metabolite content, $\mu\text{mol/g}$ dry weight |                  |                  |                  |
|-----|-------------------|-------------|------|-----------------------------------------|--------------------------------------------------|------------------|------------------|------------------|
|     |                   |             |      |                                         | HW                                               | ET               | LW               | RT               |
| 1   | Glyoxylic acid    | 9.37        | 1090 | 218                                     | -                                                | -                | -                | -                |
| 2   | Oxalic acid       | 9.51        | 1097 | 190                                     | -                                                | -                | -                | -                |
| 3   | Valine (2TMS)     | 11.28       | 1185 | 218                                     | 0.09 $\pm$ 0.02                                  | 0.09 $\pm$ 0.024 | 0.04 $\pm$ 0.009 | 0.04 $\pm$ 0.008 |
| 4   | Urea              | 11.94       | 1217 | 189                                     | -                                                | -                | -                | -                |
| 5   | Ethanolamine      | 12.36       | 1238 | 174                                     | -                                                | -                | -                | -                |
| 6   | Phosphoric acid   | 12.52       | 1246 | 299                                     | -                                                | -                | -                | -                |
| 7   | Leucine (2TMS)    | 12.52       | 1247 | 158                                     | 0.06 $\pm$ 0.01                                  | 0.08 $\pm$ 0.01  | 0.03 $\pm$ 0.008 | 0.02 $\pm$ 0.004 |
| 8   | <b>Glycerol</b>   | 12.60       | 1250 | 218                                     | 2.54 $\pm$ 0.99                                  | 2.57 $\pm$ 0.67  | 0.55 $\pm$ 0.11  | 1.16 $\pm$ 0.26  |
| 9   | Isoleucine (2TMS) | 13.00       | 1270 | 218                                     | 0.06 $\pm$ 0.01                                  | 0.07 $\pm$ 0.01  | 0.03 $\pm$ 0.01  | 0.03 $\pm$ 0.004 |

|    |                                 |       |      |     |               |               |               |               |
|----|---------------------------------|-------|------|-----|---------------|---------------|---------------|---------------|
| 10 | Proline                         | 13.04 | 1272 | 142 | 0.11±0.02     | 0.07±0.02     | 0.02±0.008    | 0.02±0.004    |
| 11 | Glycine (3TMS)                  | 13.22 | 1284 | 248 | 0.03±0.008    | 0.01±0.005    | 0.08±0.002    | 0.006±0.002   |
| 12 | Succinic acid                   | 13.52 | 1296 | 247 | 0.03±0.004    | 0.03±0.007    | 0.06±0.007    | 0.02±0.004    |
| 13 | Glyceric acid                   | 13.82 | 1312 | 292 | -             | -             | -             | -             |
| 14 | Fumaric acid                    | 14.37 | 1341 | 245 | 0.0013±0.0004 | 0.0019±0.0002 | 0.0031±0.0004 | 0.0015±0.0003 |
| 15 | Serine (3TMS)                   | 14.47 | 1346 | 218 | 0.12±0.03     | 0.07±0.02     | 0.06±0.01     | 0.04±0.01     |
| 16 | Threonic acid-1,4-lactone       | 14.74 | 1360 | 247 | -             | -             | -             | -             |
| 17 | Threonine (3TMS)                | 15.02 | 1375 | 291 | 0.08±0.01     | 0.10±0.01     | 0.05±0.007    | 0.03±0.007    |
| 18 | 2-deoxytetronic acid            | 16.04 | 1428 | 233 | -             | -             | -             | -             |
| 19 | Citramalic acid                 | 16.74 | 1464 | 247 | -             | -             | -             | -             |
| 20 | Malic acid                      | 17.18 | 1487 | 233 | 0.0076±0.0005 | 0.0068±0.0007 | 0.0064±0.0012 | 0.0032±0.0004 |
| 21 | Threitol                        | 17.42 | 1499 | 217 | -             | -             | -             | -             |
| 22 | Pentadecane                     | 17.45 | 1500 | 71  | -             | -             | -             | -             |
| 23 | Erythritol                      | 17.57 | 1507 | 307 | -             | -             | -             | -             |
| 24 | Salicylic acid                  | 17.58 | 1508 | 267 | 0.016±0.002   | 0.012±0.004   | 0.121±0.036   | 0.009±0.002   |
| 25 | Pyroglutamic acid               | 17.67 | 1517 | 156 | -             | -             | -             | -             |
| 26 | Aspartic acid (3TMS)            | 17.80 | 1519 | 232 | 0.055±0.013   | 0.031±0.007   | 0.025±0.007   | 0.012±0.003   |
| 27 | Erythronic acid                 | 18.25 | 1543 | 292 | -             | -             | -             | -             |
| 28 | <b>Threonic acid</b>            | 18.61 | 1562 | 292 | -             | -             | -             | -             |
| 29 | Pyrogallol                      | 19.35 | 1600 | 342 | -             | -             | -             | -             |
| 30 | 3-Hydroxy-3-methylglutaric acid | 19.38 | 1602 | 247 | -             | -             | -             | -             |
| 31 | 5-hydroxypipelicolic acid       | 19.45 | 1606 | 244 | -             | -             | -             | -             |
| 32 | Glutamic acid (3TMS)            | 19.75 | 1621 | 246 | 0.28±0.05     | 0.35±0.06     | 0.22±0.03     | 0.09±0.02     |
| 33 | Phenylalanine (2TMS)            | 19.77 | 1622 | 192 | 0.05±0.01     | 0.18±0.03     | 0.05±0.01     | 0.03±0.01     |

|    |                            |       |      |     |             |             |             |             |
|----|----------------------------|-------|------|-----|-------------|-------------|-------------|-------------|
| 34 | Phloroglucinol             | 20.22 | 1646 | 342 | 0.25±0.04   | 0.31±0.04   | 0.49±0.05   | 0.47±0.06   |
| 35 | Unknown pentose            | 20.42 | 1656 | 103 | -           | -           | -           | -           |
| 36 | Arabinose                  | 20.56 | 1663 | 103 | 0.037±0.001 | 0.054±0.002 | 0.064±0.001 | 0.079±0.001 |
| 37 | Hydroxypyrimidine          | 20.67 | 1669 | 358 | -           | -           | -           | -           |
| 38 | Ribose                     | 20.83 | 1678 | 103 | -           | -           | -           | -           |
| 39 | $\alpha$ -Aminoadipic acid | 20.96 | 1684 | 260 | -           | -           | -           | -           |
| 40 | Unknown pentitol           | 21.14 | 1694 | 103 | -           | -           | -           | -           |
| 41 | Unknown pentitol           | 21.32 | 1704 | 217 | -           | -           | -           | -           |
| 42 | Isocitric lactone          | 21.36 | 1706 | 157 | -           | -           | -           | -           |
| 43 | Arabitol                   | 21.58 | 1718 | 307 | -           | -           | -           | -           |
| 44 | Fucose                     | 21.63 | 1721 | 160 | -           | -           | -           | -           |
| 45 | Aconitic acid              | 22.14 | 1750 | 229 | 0.29±0.04   | 0.22±0.04   | 0.25±0.04   | 0.05±0.01   |
| 46 | Tetrahydroxybenzene        | 22.25 | 1756 | 430 | -           | -           | -           | -           |
| 47 | Lyxonic acid               | 22.34 | 1761 | 292 | -           | -           | -           | -           |
| 48 | Glutamine (3TMS)           | 22.54 | 1772 | 156 | 0.24±0.02   | 0.29±0.02   | 0.04±0.02   | 0.03±0.01   |
| 49 | Unknown sugar              | 22.61 | 1776 | 319 | -           | -           | -           | -           |
| 50 | Unknown sugar              | 23.06 | 1802 | 217 | -           | -           | -           | -           |
| 51 | Ornithine                  | 23.26 | 1813 | 142 | -           | -           | -           | -           |
| 52 | <b>Citric acid</b>         | 23.37 | 1820 | 465 | 32.13±1.56  | 30.87±4.79  | 18.50±2.90  | 11.37±2.82  |
| 53 | Isocitric acid             | 23.39 | 1821 | 245 | -           | -           | -           | -           |
| 54 | Unknown sugar              | 23.50 | 1827 | 204 | -           | -           | -           | -           |
| 55 | Homogentisic acid          | 23.58 | 1832 | 384 | -           | -           | -           | -           |
| 56 | Phytol                     | 23.66 | 1837 | 123 | -           | -           | -           | -           |
| 57 | Dehydroascorbic acid       | 23.74 | 1841 | 173 | -           | -           | -           | -           |

|    |                        |       |      |     |             |             |             |             |
|----|------------------------|-------|------|-----|-------------|-------------|-------------|-------------|
| 58 | Myristic acid          | 23.84 | 1847 | 285 | -           | -           | -           | -           |
| 59 | Unknown fatty alcohol  | 24.09 | 1862 | 123 | -           | -           | -           | -           |
| 60 | <b>Fructose</b>        | 24.21 | 1869 | 364 | 0.16±0.01   | 0.32±0.12   | 1.19±0.30   | 0.69±0.17   |
| 61 | Mannose                | 24.45 | 1883 | 319 | 0.006±0.001 | 0.015±0.004 | 0.028±0.004 | 0.030±0.007 |
| 62 | Galactose              | 24.51 | 1887 | 319 | 0.05±0.008  | 0.07±0.03   | 0.17±0.03   | 0.10±0.02   |
| 63 | Glucose                | 24.62 | 1893 | 319 | 0.09±0.01   | 0.35±0.07   | 0.21±0.07   | 0.53±0.14   |
| 64 | Lysine (4TMS)          | 25.19 | 1928 | 156 | 0.02±0.001  | 0.02±0.002  | 0.02±0.002  | 0.02±0.001  |
| 65 | Tyrosine (3TMS)        | 25.32 | 1936 | 354 | -           | -           | -           | -           |
| 66 | <b>Mannitol</b>        | 25.35 | 1938 | 421 | 117± 21     | 169±10      | 186±11      | 119±30      |
| 67 | Dulcitol               | 25.43 | 1943 | 319 | -           | -           | -           | -           |
| 68 | Ascorbic acid          | 25.54 | 1950 | 332 | -           | -           | -           | -           |
| 69 | Pentadecanoic acid     | 25.55 | 1951 | 299 | -           | -           | -           | -           |
| 70 | Galacturonic acid      | 25.75 | 1963 | 333 | -           | -           | -           | -           |
| 71 | Unknown sugar          | 25.79 | 1966 | 361 | -           | -           | -           | -           |
| 72 | Ononitol               | 25.96 | 1976 | 318 | -           | -           | -           | -           |
| 73 | Gluconic acid          | 26.24 | 1994 | 333 | -           | -           | -           | -           |
| 74 | Trihydroxybenzoic acid | 26.31 | 1998 | 443 | -           | -           | -           | -           |
| 75 | Scillo-Inositol        | 26.70 | 2024 | 318 | -           | -           | -           | -           |
| 76 | Unknown sugar          | 26.88 | 2036 | 217 | -           | -           | -           | -           |
| 77 | Unknown sugar          | 26.96 | 2041 | 305 | -           | -           | -           | -           |
| 78 | Palmitic acid          | 27.02 | 2045 | 313 | -           | -           | -           | -           |
| 79 | Unknown polyol         | 27.16 | 2055 | 333 | -           | -           | -           | -           |
| 80 | Myo-Inositol           | 27.62 | 2085 | 318 | 0.03±0.001  | 0.03±0.001  | 0.04±0.002  | 0.04±0.003  |
| 81 | Unknown polyol         | 27.62 | 2085 | 259 | -           | -           | -           | -           |

|     |                       |       |      |     |             |             |             |             |
|-----|-----------------------|-------|------|-----|-------------|-------------|-------------|-------------|
| 82  | Unknown polyol        | 28.07 | 2114 | 307 | -           | -           | -           | -           |
| 83  | <b>Unknown polyol</b> | 28.31 | 2130 | 259 | -           | -           | -           | -           |
| 84  | <b>Unknown polyol</b> | 29.19 | 2188 | 231 | -           | -           | -           | -           |
| 85  | <b>Volemitol</b>      | 29.61 | 2218 | 421 | -           | -           | -           | -           |
| 86  | Oleic acid            | 29.80 | 2231 | 339 | -           | -           | -           | -           |
| 87  | Unknown polyol        | 29.88 | 2237 | 217 | -           | -           | -           | -           |
| 88  | Unknown sugar         | 29.97 | 2243 | 204 | -           | -           | -           | -           |
| 89  | Stearic acid          | 30.00 | 2246 | 341 | -           | -           | -           | -           |
| 90  | Unknown disaccharide  | 30.19 | 2260 | 361 | -           | -           | -           | -           |
| 91  | Difucol               | 30.55 | 2282 | 682 | -           | -           | -           | -           |
| 92  | Arachidonic acid      | 31.63 | 2363 | 79  | -           | -           | -           | -           |
| 93  | Diphlorethol          | 32.03 | 2392 | 610 | -           | -           | -           | -           |
| 94  | Glycerol-1-myristate  | 32.05 | 2394 | 343 | -           | -           | -           | -           |
| 95  | Unknown sugar         | 32.66 | 2440 | 217 | -           | -           | -           | -           |
| 96  | Sucrose               | 35.08 | 2630 | 437 | 0.03±0.008  | 0.18±0.05   | 0.13±0.04   | 0.46±0.10   |
| 97  | Lactose               | 35.68 | 2679 | 319 | 0.015±0.005 | 0.062±0.021 | 0.021±0.009 | 0.019±0.003 |
| 98  | <b>Trehalose</b>      | 36.33 | 2732 | 361 | -           | -           | -           | -           |
| 99  | Unknown sugar         | 36.59 | 2754 | 361 | -           | -           | -           | -           |
| 100 | Unknown sugar         | 36.69 | 2762 | 204 | -           | -           | -           | -           |
| 101 | Unknown polyol        | 36.82 | 2775 | 204 | -           | -           | -           | -           |
| 102 | Lactitol              | 36.91 | 2780 | 361 | -           | -           | -           | -           |
| 103 | Tetracosenoic acid    | 37.10 | 2796 | 423 | -           | -           | -           | -           |
| 104 | Squalene              | 37.21 | 2805 | 81  | -           | -           | -           | -           |
| 105 | Maltitol              | 37.36 | 2816 | 204 | -           | -           | -           | -           |

|     |                                       |       |      |     |   |   |   |   |
|-----|---------------------------------------|-------|------|-----|---|---|---|---|
| 106 | <b>Unknown polyol</b>                 | 37.86 | 2858 | 361 | - | - | - | - |
| 107 | <b>Tocopherol <math>\delta</math></b> | 38.14 | 2880 | 474 | - | - | - | - |
| 108 | Unknown sugar                         | 38.25 | 2890 | 319 | - | - | - | - |
| 109 | Unknown sugar                         | 38.40 | 2901 | 319 | - | - | - | - |
| 110 | Unknown sugar                         | 38.55 | 2914 | 217 | - | - | - | - |
| 111 | Unknown sugar                         | 38.85 | 2938 | 204 | - | - | - | - |
| 112 | Tocopherol $\beta$                    | 39.07 | 2957 | 488 | - | - | - | - |
| 113 | Unknown sugar                         | 39.16 | 2964 | 204 | - | - | - | - |
| 114 | Tocopherol $\gamma$                   | 39.19 | 2967 | 488 | - | - | - | - |
| 115 | Unknown polyol                        | 39.40 | 2984 | 204 | - | - | - | - |
| 116 | Unknown sugar                         | 39.51 | 2992 | 361 | - | - | - | - |
| 117 | Unknown sugar                         | 39.56 | 2996 | 204 | - | - | - | - |
| 118 | Unknown sugar                         | 39.64 | 3003 | 361 | - | - | - | - |
| 119 | <b>Unknown sugar</b>                  | 40.56 | 3078 | 361 | - | - | - | - |
| 120 | Tocopherol $\alpha$                   | 40.69 | 3089 | 502 | - | - | - | - |
| 121 | Cholesterol                           | 40.76 | 3095 | 329 | - | - | - | - |
| 122 | Unknown sterol                        | 41.19 | 3130 | 255 | - | - | - | - |
| 123 | Unknown sterol                        | 41.66 | 3168 | 129 | - | - | - | - |
| 124 | Unknown sterol                        | 41.77 | 3177 | 129 | - | - | - | - |
| 125 | Unknown polyol                        | 41.92 | 3190 | 205 | - | - | - | - |
| 126 | <b>Fucosterol</b>                     | 42.71 | 3254 | 484 | - | - | - | - |
| 127 | Unknown sterol                        | 42.85 | 3266 | 129 | - | - | - | - |
| 128 | Unknown trisaccharide                 | 46.06 | 3529 | 361 | - | - | - | - |
| 129 | Unknown trisaccharide                 | 46.27 | 3546 | 361 | - | - | - | - |

|     |                       |       |      |     |   |   |   |   |
|-----|-----------------------|-------|------|-----|---|---|---|---|
| 130 | Unknown trisaccharide | 48.25 | 3708 | 361 | - | - | - | - |
| 131 | Unknown trisaccharide | 48.35 | 3716 | 361 | - | - | - | - |
| 132 | Unknown trisaccharide | 48.42 | 3722 | 361 | - | - | - | - |
